# Supplementary material
Source: PubMed Central journal article supplement (PMC7987870)
Supplement: NIHMS1634770-supplement-1.pdf [file NIHMS1634770-supplement-1.pdf]

**Appendix**  
**Food Insecurity and Intimate Partner Violence Among HIV-Positive Individuals in Rural Kenya**  
**Hatcher et al.**

**Appendix Table 1.** Unadjusted Negative Binomial Regressions of IPV and Categorical Food Insecurity, by Sex (n=720)

|                                                         | Entire cohort (n=716) |                 | Women's IPV victimization<br>(n=394) |                 | Men's IPV perpetration<br>(n=322) |                 |
|---------------------------------------------------------|-----------------------|-----------------|--------------------------------------|-----------------|-----------------------------------|-----------------|
|                                                         | IRR (95% CI)          | <i>p</i> -value | IRR (95% CI)                         | <i>p</i> -value | IRR (95% CI)                      | <i>p</i> -value |
| Food insecurity (categorical as mild, moderate, severe) | 1.41 (1.10, 1.82)     | 0.007           | 1.42 (0.97, 2.06)                    | 0.068           | 1.31 (0.95, 1.80)                 | 0.097           |

IRR, incident risk ratio; IPV, intimate partner violence.
